# Supplementary material for: Coupling of ReS2 nanosheet arrays with hollow NiCoS4 nanocubes enables ultrafast Na+ diffusion kinetics and super Na+ storage of a NiCoS4@ReS2 heterostructure
Source: Royal Society of Chemistry journal article supplement (doi:10.1039/d1qm00841b), 2021-01-01
Supplement: d1qm00841b1.pdf [file d1qm00841b1.pdf]

Supporting Information

**Coupling of ReS<sub>2</sub> nanosheet arrays with hollow NiCoS<sub>4</sub> nanocubes enables ultrafast Na<sup>+</sup> diffusion kinetics and super Na<sup>+</sup> storage of NiCoS<sub>4</sub>@ReS<sub>2</sub> heterostructure**

Zhiyong Li<sup>a, b</sup>, Rui Sun<sup>a, b</sup>, Zhaoxia Qin<sup>a</sup>, Xinlong Liu<sup>b</sup>, Caihong Wang<sup>a</sup>, Shengjun Lu<sup>a\*</sup>, Yufei Zhang<sup>c\*</sup> and Haosen Fan<sup>b\*</sup>

<sup>a</sup> College of Materials Science and Metallurgy Engineering, Guizhou University, Guiyang 550025, PR China

<sup>b</sup> School of Chemistry and Chemical Engineering, Guangzhou University, Guangzhou 510006, China

<sup>c</sup> School of Chemical Engineering and Light Industry, Guangdong University of Technology, Guangzhou 510006, China

E-mail: sjlu@gzu.edu.cn; yfzhang@gdut.edu.cn; hsfan@gzhu.edu.cn

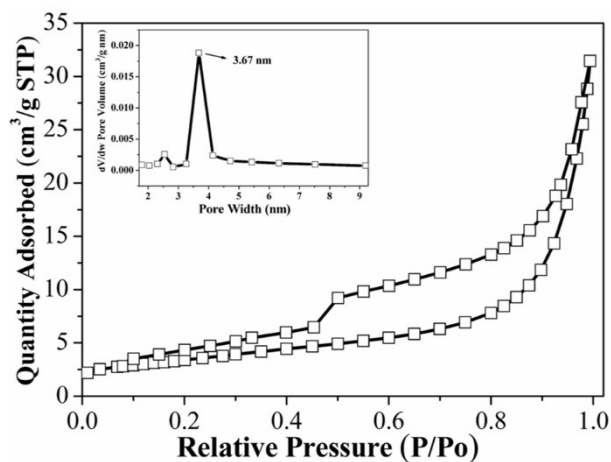

Fig. S1 N<sub>2</sub> adsorption/desorption isotherm with surface area evaluated from BET analysis. Inset depicts the pore size distribution of NiCoS<sub>4</sub>@ReS<sub>2</sub>.

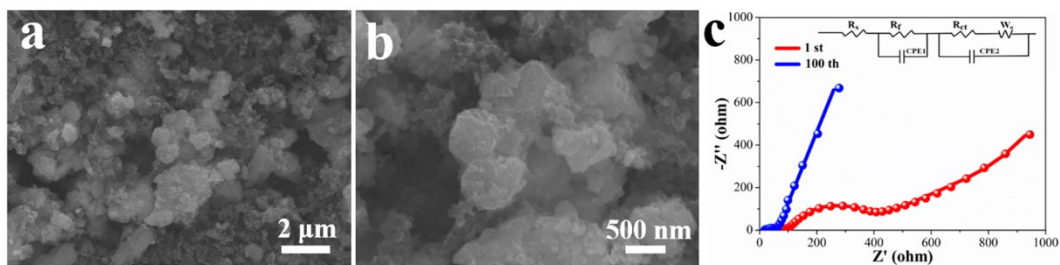

Fig. S2 (a, b) SEM images of NiCoS<sub>4</sub>@ReS<sub>2</sub> after cycling. (c) EIS spectra of NiCoS<sub>4</sub>@ReS<sub>2</sub> after different cycles.
